# Supplementary material for: Spatially confined magnesiothermic reduction induced uniform mesoporous hollow silicon carbide nanospheres for high-performance supercapacitors
Source: Royal Society of Chemistry journal article supplement (doi:10.1039/d2cc04723c), 2022-01-01
Supplement: d2cc04723c1.pdf [file d2cc04723c1.pdf]

Electronic Supplementary Material (ESI) for ChemComm.  
This journal is © The Royal Society of Chemistry 2022

## **Spatially confined magnesiothermic reduction induced uniform mesoporous hollow silicon carbide nanospheres for high-performance supercapacitors**

Jianhua Hou <sup>\*a</sup>, Liang Fang <sup>a</sup>, Xiaozhi Wang<sup>a</sup>, Hong Gao<sup>\*b</sup> and Guoxiu Wang<sup>\*b</sup>

<sup>a</sup> School of Environmental Science and Engineering, Yangzhou University, Yangzhou 225000, PR China.

<sup>b</sup> Centre for Clean Energy Technology, School of Mathematical and Physical Sciences, Faculty of Science, University of Technology Sydney, City Campus, Broadway, NSW 2007, Australia.

\* Corresponding author. E-mail addresses: [jhhou@yzu.edu.cn](mailto:jhhou@yzu.edu.cn), [hong.gao@uts.edu.au](mailto:hong.gao@uts.edu.au), [guoxiu.wang@uts.edu.au](mailto:guoxiu.wang@uts.edu.au).

### **Experimental section**

#### **Materials.**

1-Ethyl-3-methylimidazolium tetrafluoroborate (EMIMBF<sub>4</sub> > 99%), KOH and HCl are analytical quality and purchased from Jiangsu Guotai Super Power New Materials Co., Ltd. Formaldehyde, magnesium powder, CTAB (hexadecyl trimethyl ammonium bromide) and 3-aminophenol were bought from Sinopharm Chemical Reagent Co., Ltd.

#### **Synthesis of mesoporous hollow carbon/silica spheres (MHS-SiO<sub>2</sub>/C).**

During the synthesis of (MHS-SiO<sub>2</sub>/C), CTAB (0.55 g) and resorcinol (0.21 g) were suspended in a solution with 9 ml ethanol and 23 ml deionized water at 25 °C. After resorcinol absolutely dissolved, ammonia solution (NH<sub>4</sub>OH, 0.22 mL, ~25wt. %) was inserted and stirred for 10 min. Then add 0.29 mL of formaldehyde, let stand for a few minutes until it turned transparent and becomes an emulsion. After that, 1 ml of TEOS was added immediately, and the prepared solution was stirred at 25 °C for 24 h, then heated in Teflon lined autoclave at 80 °C for another 24 hours. The solid product was produced by centrifugation and freeze drying. MHSs-C/SiO<sub>2</sub> composites were obtained by annealing the solid product at 800 °C for 2.5 h with a ramp rate of 1.5 °C min<sup>-1</sup> in N<sub>2</sub> atmosphere. Furthermore, excess silica was eliminated by 10% HF solution for 24 h, thus mesoporous hollow carbon spheres (MHS-C) were produced. The MHS-C/SiO<sub>2</sub> composites were calcined at 600 °C for 6 h in air to produce the mesoporous hollow silica spheres.

## Magnesiothermic reduction (MR) technology prepares mesoporous hollow SiC nanospheres (MHS-SiC).

MHS-SiC material was synthesized by the interfacial interaction of SiO<sub>2</sub> and carbon during MR process. A specific quantity of MHS-SiO<sub>2</sub>/C and pure magnesium powders were mixed and placed into a ceramic, which was subsequently transferred to a tube furnace in argon atmosphere. With a ramp of 5 °C min<sup>-1</sup>, the furnace was heated to 620 °C and maintained for 3.0 h. The acquired sample was then collected after returning to room temperature in a pure argon atmosphere. To get eliminate the by-product MgO from the sample, pure water and 1.0 M HCl solution were utilized. The 5 wt% HF solution was used to eliminate the unreacted SiO<sub>2</sub>. The resulting sample was subsequently purified, cleaned with deionized water, and dried under vacuum at 110 °C. This as-prepared product is known as MHS-SiC.

### Characterization.

Field emission scanning electron microscopy (FESEM) and Transmission electron microscopy (TEM) examinations were carried out using the Hitachi S-4800, Tecnai G2 F30 S-Twin. PANalytical-X-pert diffractometer (Cu K radiation at 40mA and 40kV) was used to detect powder X-ray diffraction (XRD) patterns (10-80° in 2θ). On a Malvern Zetasizer NanoZS instrument, dynamic light scattering (DLS) parameters were determined. For the XPS examination, an Axis Ultra spectrometer was employed. Micromeritics-ASAP-2020 was used to measure the nitrogen adsorption-desorption isotherm at 77K and relative pressure  $p/p_0$  of  $1.2 \times 10^{-6}$ -0.990. Test samples were degassed at 250 °C for at least 4 hours before to the measurement. Pore size distribution and specific surface area ( $S_{\text{BET}}$ ) were determined by density functional theory (DFT) calculations and Brunauer-Emmett-Teller (BET) measurements.

### Electrochemical measurements.

The electrochemical characteristics of MHS-SiC were investigated in both EMIMBF<sub>4</sub> and 6 M KOH electrolytes. The electrodes were prepared by mixing MHS-SiC (86 wt. %), PTFE binder (4 wt. %) and acetylene black (10 wt. %). The EDLC current collectors were stainless steel (6 M KOH electrolyte) and aluminium mesh (EMIMBF<sub>4</sub> electrolyte) with 5-7 mg/ cm<sup>2</sup> electrode materials. Subsequently, the electrodes were vacuum-dried at 110°C for 8 hours. And polypropylene membrane was selected as separator. The cyclic voltammetry (CV), galvanostatic charge/discharge, and AC impedance spectroscopy (EIS) were measured through the CHI660E electrochemical workstation. With a 5 mV voltage amplitude, impedance spectra were measured in frequency range of 0.01 Hz–10 kHz. The capacitor's cutoff charge voltage of 6 M KOH solution was set to 0-1.0 V, while the cutoff charge voltage of EMIMBF<sub>4</sub> solution was 0-3.5 V.

Equation (1) was used to determine the specific capacitance for a single electrode.

$$c_g = \frac{2I}{(dV/dt)m} \quad (1)$$

Where  $dV/dt$ (V/s) = slope of a discharge curve,  $m$ (g) = single electrode active material mass, and  $I$ (A) = discharge current.  $P_{\text{cell}}$  (specific power density) and  $E_{\text{cell}}$  (specific energy density) calculations were also evaluated for symmetrical supercapacitors, which are mentioned in the equation (2) and (3).

$$P_{\text{cell}} = \frac{E_{\text{cell}}}{t} \quad (2)$$

$$E_{cell} = \frac{C_g \Delta V^2}{8 \times 3.6} \quad (3)$$

Here,  $t(h)$ , and  $\Delta V(V)$  represented the discharge time and cell voltage after ohmic drop, respectively.

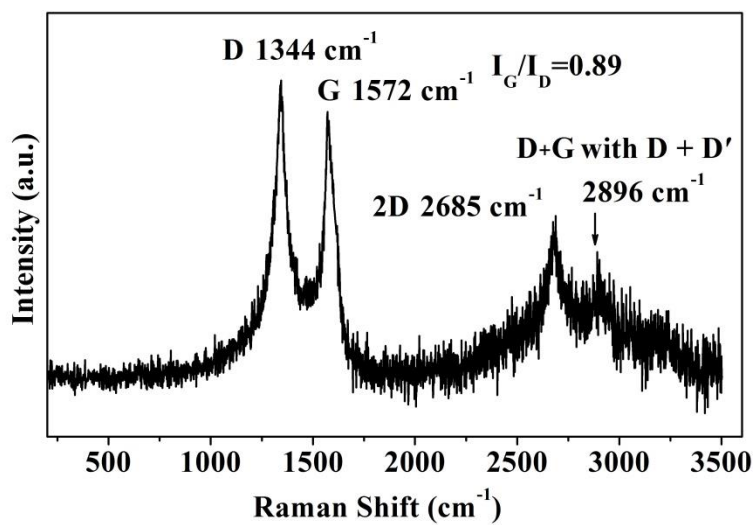

Fig. S1. Raman spectrum of MHS-SiC.

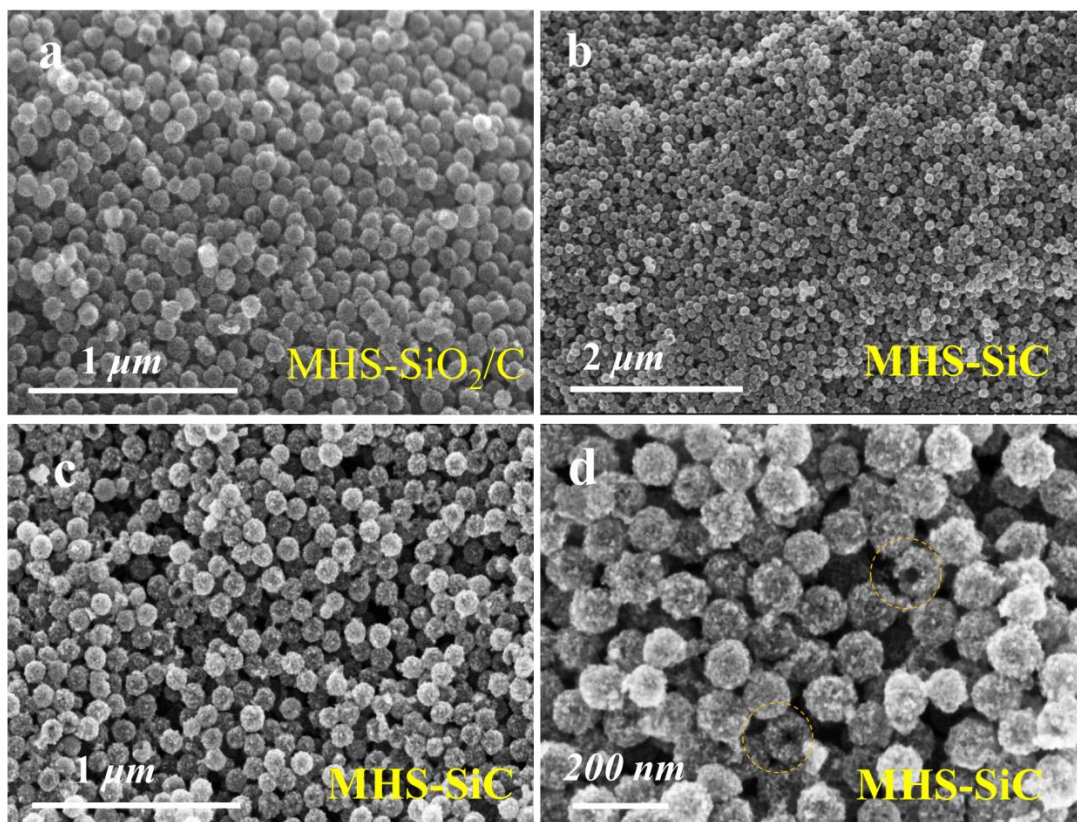

Fig. S2. (a) SEM images of MHS-SiO<sub>2</sub>/C, (b, c,d) SEM images of MHS-SiC, the marked circles show the hollow structures.



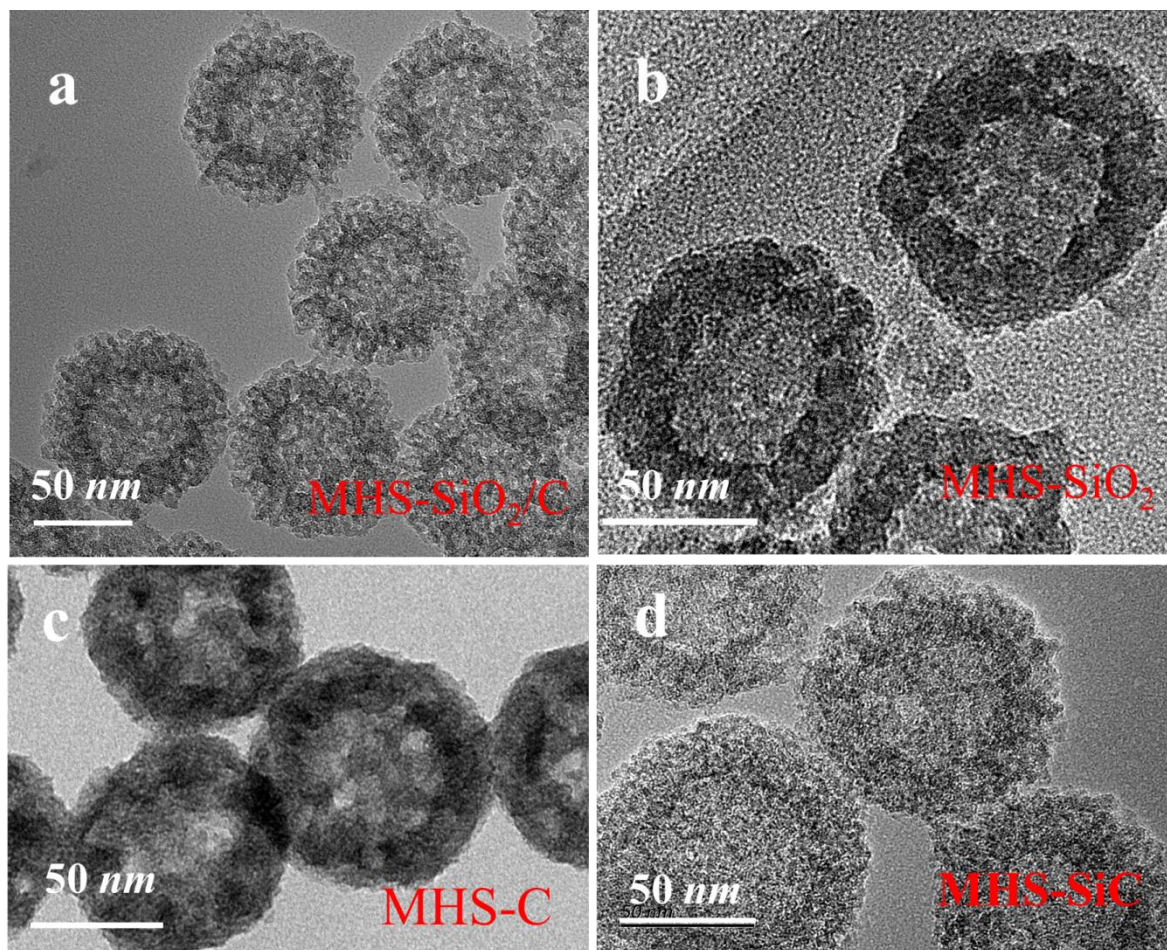

Fig. S3. TEM images of (a) MHS-SiO<sub>2</sub>/C, (b) MHS-SiO<sub>2</sub>, (c) MHS-C and (d) MHS-SiC.

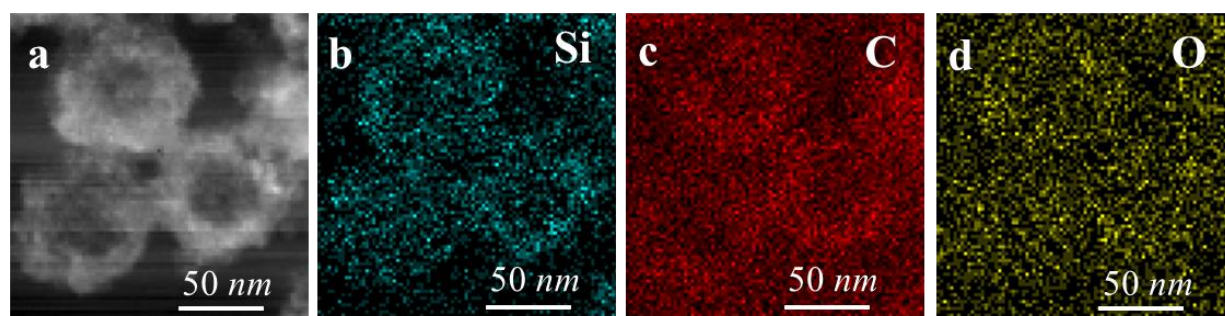

Fig. S4. (a) STEM, and corresponding (b-d) elemental mapping images of MHS-SiC

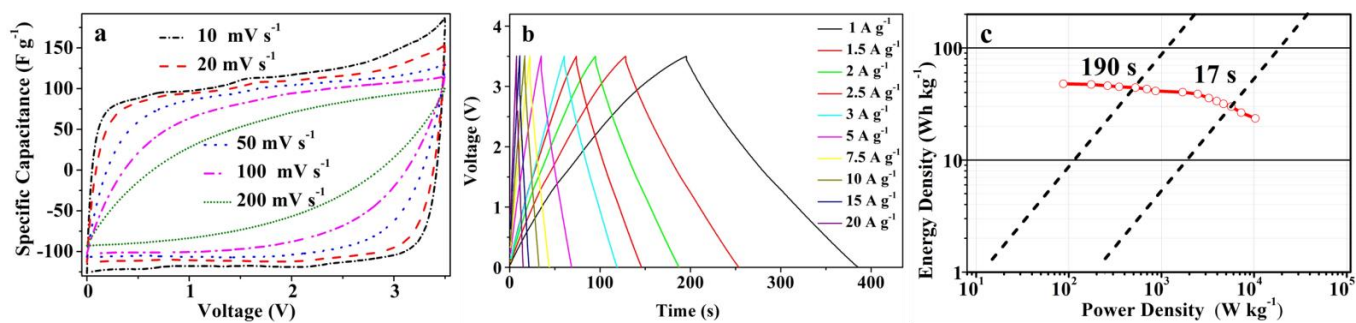

Fig. S5. (a) Cyclic voltammograms, (b) Galvanic charge-discharge curves, (c) Ragone plot of MHS-SiC in ionic liquid EMIMBF<sub>4</sub> electrolyte.

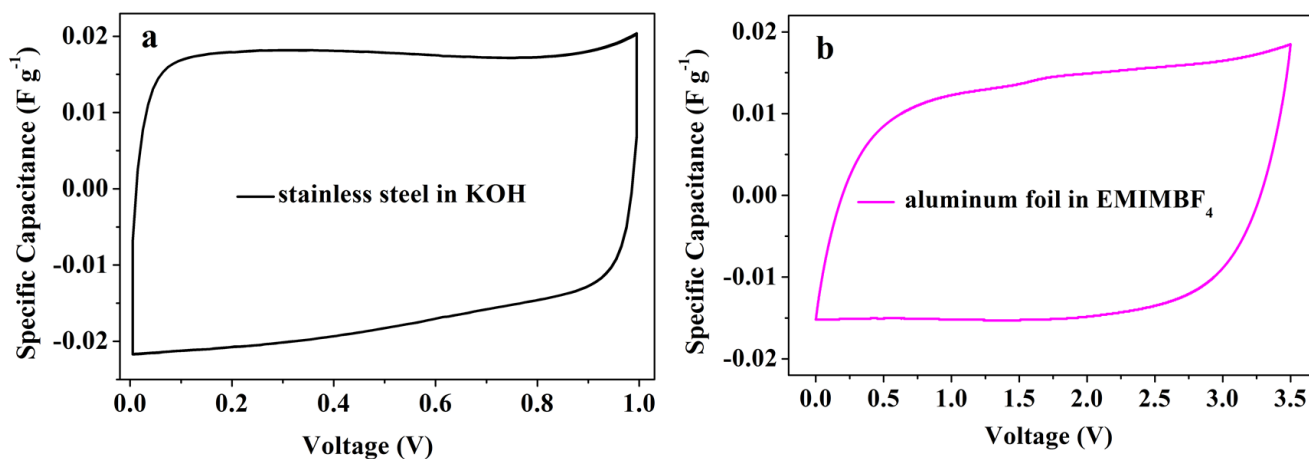

Fig. S6. (a) Cyclic voltammograms of stainless steel in KOH and aluminum foil in EMIMBF<sub>4</sub> electrolyte at a scan rate of 0.1 V s<sup>-1</sup>.

**Table S1.** Comparison of specific surface area, pore volume and specific capacitance of the obtained **MHS-SiC** sample with previously reported samples.(a is a two-electrode system, and b is a three-electrode system)

| Materials                                              | $S_{\text{BET}}$<br>( $\text{m}^2 \text{g}^{-1}$ ) | Pore<br>volume<br>( $\text{cm}^3 \text{g}^{-1}$ ) | Capacitance<br>( $\text{F g}^{-1}$ ) | Current<br>density          | Electrolyte                                                   | Ref.                             |
|--------------------------------------------------------|----------------------------------------------------|---------------------------------------------------|--------------------------------------|-----------------------------|---------------------------------------------------------------|----------------------------------|
| <b>Mesoporous Hollow SiC<br/>Nanospheres (MHS-SiC)</b> | <b>868</b>                                         | <b>1.49</b>                                       | <b>134</b>                           | <b>0.1 A g<sup>-1</sup></b> | <b>6 M KOH</b>                                                | <b>This<br/>work<sup>a</sup></b> |
|                                                        |                                                    |                                                   | <b>116</b>                           | <b>100 A g<sup>-1</sup></b> |                                                               |                                  |
|                                                        |                                                    |                                                   | <b>114</b>                           | <b>0.1 A g<sup>-1</sup></b> | <b>EMIMBF<sub>4</sub></b>                                     |                                  |
|                                                        |                                                    |                                                   | <b>86</b>                            | <b>20 A g<sup>-1</sup></b>  |                                                               |                                  |
| silicon-oxy-carbide (SiOC)                             | 5.64                                               |                                                   | 102.3                                | 5 mA g <sup>-1</sup>        | 1 M Li <sub>2</sub> SO <sub>4</sub><br>1 M TEABF <sub>4</sub> | 1 <sup>a</sup>                   |
| SiC nanowires                                          | -                                                  | -                                                 | 29.5                                 | 0.25 A g <sup>-1</sup>      | 2 M KCl                                                       | 2 <sup>b</sup>                   |
| Silicon Carbide<br>Nanocauliflowers                    | -                                                  | -                                                 | 72                                   | 1.43 A g <sup>-1</sup>      | 1 M Na <sub>2</sub> SO <sub>4</sub>                           | 3 <sup>a</sup>                   |
|                                                        |                                                    |                                                   | 41                                   | 0.71 A g <sup>-1</sup>      |                                                               |                                  |
| ordered mesoporous<br>SiC@C                            | 757.4                                              | -                                                 | 194.8                                | 0.2 A g <sup>-1</sup>       | 6 M KOH                                                       | 4 <sup>b</sup>                   |
|                                                        |                                                    |                                                   | 123                                  | 5 A g <sup>-1</sup>         |                                                               |                                  |
| SiC/C nanosheets                                       |                                                    |                                                   | 130                                  | 10 mV s <sup>-1</sup>       | 1 M Na <sub>2</sub> SO <sub>4</sub>                           | 5 <sup>b</sup>                   |
|                                                        |                                                    |                                                   | 69                                   | 0.5V s <sup>-1</sup>        |                                                               |                                  |
| SiC nanowire-derived<br>carbon                         | 1182                                               | -                                                 | 200                                  | 2 A g <sup>-1</sup>         | 6 M KOH                                                       | 6 <sup>a</sup>                   |
|                                                        |                                                    |                                                   | 95                                   | 10 A g <sup>-1</sup>        |                                                               |                                  |
| porous carbon/ silicon<br>carbide                      | 1357.9                                             | 0.76                                              | 234.2                                | 1 A g <sup>-1</sup>         | 1 M Na <sub>2</sub> SO <sub>4</sub>                           | 7 <sup>b</sup>                   |
|                                                        |                                                    |                                                   | 167.3                                | 20 A g <sup>-1</sup>        |                                                               |                                  |
| boron-doped SiC thin film<br>on silicon                |                                                    | -                                                 | 232                                  | 2.2 A g <sup>-1</sup>       | 1 M H <sub>2</sub> SO <sub>4</sub>                            | 8 <sup>b</sup>                   |
|                                                        |                                                    |                                                   | 198                                  | 2 mV s <sup>-1</sup>        |                                                               |                                  |
|                                                        |                                                    |                                                   | 116                                  | 80 mV s <sup>-1</sup>       |                                                               |                                  |
| SiCNWs@<br>NiCo <sub>2</sub> O <sub>4</sub> NCs        | 55.4                                               |                                                   | 131                                  | 1 A g <sup>-1</sup>         | PVA-KOH                                                       | 9 <sup>a</sup>                   |
|                                                        |                                                    |                                                   | 72                                   | 20 A g <sup>-1</sup>        |                                                               |                                  |
| C doped SiC                                            | 1789                                               |                                                   | 162                                  | 0.5 A g <sup>-1</sup>       | PVA-H <sub>2</sub> SO <sub>4</sub>                            | 10 <sup>a</sup>                  |
|                                                        |                                                    |                                                   | 102                                  | 10 A g <sup>-1</sup>        |                                                               |                                  |

## References

- 1 P. Pazhamalai, K. Krishnamoorthy, S. Sahoo, V. Mariappan, S. Kim, *Chem. Eng. J.*, 2020, **387**, 123886.
- 2 X. Li, W. Li, Q. Liu, S. Chen, L. Wang, F. Gao, G. Shao, Y. Tian, Z. Lin, W. Yang, *Adv. Funct. Mater.*, 2021, **31**, 2008901.
- 3 A. Sanger, A. Kumar, A. Kumar, P. Jain, Y.r Mishra, R. Chandra, *Ind. Eng. Chem. Res.* 2016, **55**, 9452-9458.
- 4 X. Liu, H. Zhao, S. Jiang, S. Wu, T. Zhao, L. Li, X. Geng, H. Yang, W. Zhou, C. Sun, Y. Chen, B., *J. Alloy. Compd.*, 2021, **881**, 160442-160450.
- 5 S. Liu, E.Wang, S.Liu, C. Guo, H.Wang, T.Yang, X. Houa, *J. Mater. Sci. Technol.*, 2022, **110**, 178-186.
- 6 X. Zou, L. Ji, H. Hsu, K. Zheng, Z. Pang, X. Lu, *J. Mater. Chem. A*, 2018, **6**, 12724-12732.
- 7 Q. Tang, X. Chen, D. Zhou, C. Liu, *Colloids Surf. A Physicochem. Eng. Asp.*, 2021, **620** , 126567-126576.
- 8 K. Kundu, A. Ghosh, A. Ray, S. Das, J. Chakraborty, S. Kumar, N. Prasad, R. Banerjee, *J Mater Sci: Mater Electron*, 2020, **31**, 17943-17952.
- 9 X. Yin, H. Li, R. Yuan, J. Lu, *J. Colloid Interf. Sci.*, 2021, **586**, 219-232.
- 10 S.C. Abbas, C. Lin, Z. Hua, Q. Deng, H. Huang, Y. Ni, S. Cao, X. Ma, *Chem. Eng. J.*, 2022, **433**, 133738.
